# VarMatch: robust matching of small variant datasets using flexible scoring schemes

Chen Sun<sup>1</sup> and Paul Medvedev<sup>1,2,3</sup>

<sup>1</sup>Department of Computer Science and Engineering, The Pennsylvania State University, USA

<sup>2</sup>Department of Biochemistry and Molecular Biology, The Pennsylvania State University, USA

<sup>3</sup>Genome Sciences Institute at the Huck, The Pennsylvania State University, USA

Received on XXXXX; revised on XXXXX; accepted on XXXXX

Associate Editor: XXXXXXXX

## ABSTRACT

**Motivation:** Small variant calling is an important component of many analyses, and, in many instances, it is important to determine the set of variants which appear in multiple callsets. Variant matching is complicated by variants that have multiple equivalent representations. Normalization and decomposition algorithms have been proposed, but are not robust to different representation of complex variants. Variant matching is also usually done to maximize the number of matches, as opposed to other optimization criteria.

**Results:** We present the VarMatch algorithm for the variant matching problem. Our algorithm is based on a theoretical result which allows us to partition the input into smaller subproblems without sacrificing accuracy. VarMatch is robust to different representation of complex variants and is particularly effective in low complexity regions or those dense in variants. It also implements different optimization criteria, such as edit distance, that can lead to different results and affect conclusions about algorithm performance. Finally, the VarMatch software provides summary statistics, annotations, and visualizations that are useful for understanding callers' performance.

**Availability:** VarMatch is freely available at:  
<https://github.com/medvedevgroup/varmatch>

**Contact:** [chensun@cse.psu.edu](mailto:chensun@cse.psu.edu)

## 1 INTRODUCTION

In recent years, next-generation sequencing data has been used in medical and genetic research to identify how genome mutations are related to phenotypes of interest (1000 Genomes Project Consortium *et al.*, 2012). In most of the studies, small variant calling, including the detection of single nucleotide variants (SNVs), multiple nucleotide variants (several SNVs occurring next to each other), or small indels (usually less than 30bp), plays a significant role. Small variant calling is a mature area, with several state-of-the-art tools, such as FreeBayes (Garrison and Marth, 2012), GATK (McKenna *et al.*, 2010), SAMtools (Li *et al.*, 2009), SNVer (Wei *et al.*, 2011), Platypus (Rimmer *et al.*, 2014), VarScan (Koboldt *et al.*, 2009), and Isaac (Raczy *et al.*, 2013). Detected variants are represented using the VCF file format (Danecek *et al.*, 2011).

An important starting point of many downstream analyses is to compare two VCF files to each other, to find matching

variants. This is important for measuring the similarity and population structure of several genomes (1000 Genomes Project Consortium *et al.*, 2010), checking that the new variants added to a database do not already exist there (Assmus *et al.*, 2013; Tan *et al.*, 2015), generating a high-confidence variant set by taking the intersection of the results of different variant callers (Zook *et al.*, 2014), evaluating their relative accuracy (Baes *et al.*, 2014), and understanding the source of their errors (Li, 2014). There have been several studies comparing datasets on the same genome generated by different aligners and variant callers (Cheng *et al.*, 2014; Baes *et al.*, 2014; Li, 2014; Hwang *et al.*, 2015; Cornish and Guda, 2015; Highnam *et al.*, 2015), and there is various software available to identify matching variants in two VCF files (*vcftools*, *rtgtools*, *bcftools*, *vt*, *bcbio*, *SMAsh* (Talwalkar *et al.*, 2014)).

Unfortunately, identifying matching variants in two VCF files is not as simple as may first seem, because applying two different VCF entries to a genome may result in the exact same donor sequence (they are *equivalent*). A VCF entry gives an allele sequence, its position on the reference, one or more alternate allele sequences of the donor, and, possibly, the donor genotype. The straightforward *strict matching algorithm* matches VCF entries which are identical, i.e. two entries that have the same position and the same reference and alternate alleles. However, this algorithm fails to match equivalent entries which are not identical. For example, Fig. 1(a) illustrates how the same 2 bp deletion can be represented by four different VCF entries.

One way to address this problem is *normalization*. Tan *et al.* (2015) showed that there is a canonical way to represent VCF entries such that two entries are equivalent if and only if their canonical representations are identical. The *normalization algorithm* is to first normalize every entry and then run the strict matching algorithm. Normalization guarantees to identify equivalent pairs of VCF entries. However, a single variant can be represented by different non-singleton sets of VCF entries. Figure 1(b) illustrates three possible ways to represent the same variant. Each individual entry is normalized, but the three VCF entry sets are not identical even though they are equivalent. These entries will not be matched by the normalization algorithm. Such variants are called *complex*.

| VCF Entry Set | Seq | C | C | A | T | A | T | A | T | G | C |
|---------------|-----|---|---|---|---|---|---|---|---|---|---|
| A             | REF |   |   |   |   |   |   |   |   |   |   |
|               | ALT | C | A | T |   |   |   |   |   |   |   |
| B             | REF |   |   |   |   |   |   | A | T | A |   |
|               | ALT |   |   |   |   |   |   | A |   |   |   |
| C             | REF |   |   |   |   |   |   |   |   |   |   |
|               | ALT | C | A | T | A | T |   |   |   |   |   |
| D             | REF |   |   |   |   |   |   |   |   |   |   |
|               | ALT | C | C | A | T | A | T |   |   |   |   |

(a)

| VCF Entry Set | Seq | A | G | C | C | G | G |
|---------------|-----|---|---|---|---|---|---|
| E             | REF |   |   |   |   |   |   |
|               | ALT | G | C | C | G |   |   |
| F             | REF |   |   |   |   |   |   |
|               | ALT | G |   |   |   |   |   |
| G             | REF | A | G |   |   |   |   |
|               | ALT | A |   |   |   |   |   |

(b)

Fig. 1: Examples of how the same variants can be represented by different VCF entries. VCF entries are represented by boxes but are grouped together into entry sets A-G. Panel (a) illustrates a variant which is a deletion of an AT from a short tandem repeat. VCF entry sets A-D are all singletons which are equivalent and represent this deletion. Panel (b) illustrates a complex variant which replaces the reference sequence GCCG with CCGA in the donor. This variant is represented by three equivalent but non-identical VCF entry sets (E-G). E is a singleton, F is composed of three entries, and G is composed of two entries. F is the normalized decomposition of E, and G is already normalized and cannot be decomposed further. The normalization algorithm would not detect any match, while the decomposition algorithm would not match G to E or F.

The *vcflib* package provides a way to partially address this problem through the decomposition of complex variants. It uses the alignment of the alternate allele to the reference allele to break-up, or decompose, a complex VCF entry into multiple shorter ones. The *decomposition algorithm* proposed in (Li, 2014; Zook *et al.*, 2014) is to first decompose all entries, then normalize them, and then run the strict matching algorithm. Decomposition can help match some VCF entry sets, however, it still does not work in some cases (see example in Figure 1(b)). Moreover, the decomposition varies based on the alignment, which is sometimes not unique or is not provided (e.g. in Platypus). Decomposition also allows fractional matches of a variant, which is difficult to interpret biologically. For example, a complex variant can be decomposed into three smaller variants of which only one is matched.

An alternate approach, which we also take in this paper, avoids strict matching altogether. To check if two sets of entries are equivalent, we just apply them to the reference and check if the resulting donor sequence is the same. Matching two variant datasets can then be formulated as finding two equivalent subsets, as large as possible. While such an approach is more computationally taxing, it avoids some of the problems with the normalization or decomposition algorithms. This approach is taken in RTG Tools, described in a pre-print of Cleary *et al.* (2015). Their tool implements an exponential time exact algorithm, but uses clever bounding strategies to prune the search space and make the run-time feasible. To avoid blow-ups in run-time, it employs a cutoff strategy when the search space is too large to skip the matching of some variants. However, RTG Tools suffers from large

RAM usage and can still fail to match variants in very dense regions, when the cut-off is activated.

Other related work includes Krawitz *et al.* (2010) and Assmus *et al.* (2013), which gives methods to check if two indels are equivalent, however, their analysis does not extend to matching non-singleton entry sets. Mäkinen and Rähkölä (2013) and Mäkinen and Valenzuela (2014) describe a global approach for comparing two variant sets: create two donor genomes by inserting the respective variant sets, and measure the edit distance between them. Their approach is notable because it uses edit distance as an optimization criteria, as opposed to the number of matched variants; however, it has not been applied to mammalian sized genomes. Wittler *et al.* (2015) also studied the problem of matching variants that are large deletions ( $\geq 20$ bp), which is complementary to our study of small variants of different types.

In this paper, we present a divide-and-conquer algorithm for the variant matching problem. It is based on a theoretical result which shows how to partition the set of variants into small clusters which can be matched independently and in parallel. The partitioning step is linear in the number of variants, and, while the run-time is still exponential within each cluster, the size of each cluster is small in practice. VarMatch is more robust to different representation of complex variants and is able to detect more matches than the normalization algorithm. It is also faster and uses an order-of-magnitude less memory than RTG Tools. We show that it is particularly useful in low complexity regions or those dense in variants.

Our theoretical result also allow VarMatch to seamlessly support different optimization criteria. VarMatch can maximize the number of variants matched, but can also maximize the sum of matched edit distances, which can lead to different results and affect conclusions about algorithm performance. VarMatch can also support matching of VCF files that include genotype information to one that does not distinguish between hetero- and homozygous calls. Finally, the VarMatch software provides summary statistics, annotations, and visualizations that are useful for understanding callers' performance.

## 2 DEFINITIONS

Let  $x$  be a sequence of elements (possibly a string). We use  $x[i]$  or  $x_i$  to denote the element at position  $i$ , for  $0 \leq i < |x|$ , and we use  $x[i, j]$  to denote the sub-sequence  $x_i, \dots, x_j$ , for  $0 \leq i \leq j < |x|$ . For two sequences  $x$  and  $y$ , we use the notation  $x \cdot y$  or just  $xy$  to be the sequence obtained by their concatenation. A *tandem repeat* is a string  $(x_1x_2)^m x_1$ , where  $x_1$  and  $x_2$  are strings,  $x_2$  is non-empty, and  $m > 1$  is an integer. We refer to  $x_1x_2$  as the *repeat unit*.

Let  $R$  be a string, which we call the reference genome. A *variant* is a triple  $(p, r, \mathbf{a})$ , where  $p$  is an index into  $R$ ,  $r$  is a string and  $\mathbf{a}$  is a pair of strings  $a_0$  and  $a_1$ , with  $r, a_0, a_1$  possibly empty. We refer to  $r$  as the reference allele and to  $\mathbf{a}$  as the alternate alleles, and require that  $r = R[p, p + |r| - 1]$ .

We refer to a variant with  $a_0 = a_1$  as *homozygous* and as *heterozygous* otherwise. For the purposes of this paper, we assume the genome is diploid, but note that a haploid genome

can be represented in our framework by setting  $a_1 = a_0$  for all variants.

We say that a variant *affects* the substring  $R[p, p + |r| - 1]$  of the reference genome. A sequence of variants  $V$  *affects* a given region of the reference if  $V$  contains at least one variant that affects that region. Let  $v = (p, r, \mathbf{a})$  and  $v' = (p', r', \mathbf{a}')$  be two variants and assume without loss of generality that  $p \leq p'$ . We say that  $v$  and  $v'$  are *independent* if the intervals  $[p, p + |r|)$  and  $[p', p' + |r'|)$  do not overlap. In other words,  $v$  and  $v'$  affect different regions of the reference genome.

We can *apply* a variant  $v = (p, r, \mathbf{a})$  to obtain two donor strings, as follows. There are three possible ways to incorporate a variant into the donor: it can be excluded or it can be included using one of two different ordering of the alleles. Let  $c \in \{-1, 0, 1\}$  be a *selection* value and let  $j \in \{0, 1\}$ . We define the selection function  $s(v, c, j)$  as  $s(v) = r$  if  $c = 0$ ,  $s(v) = a_j$  if  $c = 1$ , and  $s(v) = a_{1-j}$  if  $c = -1$ . Applying  $v$  using  $c$  then gives two strings  $d_0$  and  $d_1$ , where  $d_j$  is obtained by replacing  $R[p, p + |r| - 1]$  with  $s(v, c, j)$ .

Let  $V$  be a sequence of variants, and let  $\Phi_V = \{0, 1, -1\}^{|V|}$  be a *selection sequence*. A selection sequence is used to represent the selection for each variant in  $V$ . Suppose that for all  $i \neq j$ , if  $|\Phi[i]| = |\Phi[j]| = 1$ , then  $V[i]$  and  $V[j]$  are independent. Then, we can *apply* the sequence of variants  $V$  using  $\Phi_V$  as follows. Let  $\Delta(R, V, \Phi, j)$  represent the string obtained by applying all the variants in parallel, where the  $i^{\text{th}}$  variant is applied using the selection function  $s(V[i], \Phi_V[i], j)$ . Because of the independence condition, the variants can be applied in parallel and the obtained string is unambiguous. Applying  $V$  using  $\Phi_V$  then gives us two strings:  $\Delta(R, V, \Phi_V, 0)$  and  $\Delta(R, V, \Phi_V, 1)$ .

Consider two sequences of variants,  $V$  and  $W$ , and their corresponding selection sequences  $\Phi_V, \Phi_W$ . We say that  $(V, \Phi_V)$  and  $(W, \Phi_W)$  are *genotype equivalent* if  $\Delta(R, V, \Phi_V, j) = \Delta(R, W, \Phi_W, j)$  for all  $j \in \{0, 1\}$ . Some variant callers do not call genotypes, but instead only determine that a variant is present. The VCF entries that such callers generate must be treated differently — each of the alternate alleles represents a possible variant, and two variants are considered matched iff they each have one alternative allele that matches. This can be represented by using the first of the two donor sequences to choose the allele, and ignoring the second donor sequence. Formally,  $(V, \Phi_V)$  and  $(W, \Phi_W)$  are *variant equivalent* if  $\Delta(R, V, \Phi_V, 0) = \Delta(R, W, \Phi_W, 0)$ .

Given a variant  $v = (p, r, \mathbf{a})$  and a selection value  $c$ , the score of  $v$  in the *unit cost model* is  $|c|$ . In the *edit distance cost model*, its score is  $|c|(D(r, a_0) + D(r, a_1))$ , where  $D(\cdot)$  is the edit distance function. For a variant sequence and a selection sequence, the score is the sum of the scores for each variant. Suppose we have two variant sequences  $V, W$  and their selection sequences  $\Phi_V, \Phi_W$ . Under the *baseline scoring scheme*, their score is the score of  $W$ , while in the *total scoring scheme*, their score is the score of  $V$  plus the score of  $W$ . Note that we can compute the score even if  $(V, \Phi_V)$  and  $(W, \Phi_W)$  are not equivalent.

In sum, we can define four different scoring functions  $F(V, W, \Phi_V, \Phi_W)$ . These correspond to a choice of the unit vs. edit distance cost model and the baseline vs. total scoring schemes. The baseline scoring scheme is appropriate when

comparing multiple datasets against one ground truth, while the total scoring scheme is more appropriate for a two-way comparison of different tools when a ground truth is not available. The unit distance cost model is traditionally used, but, unlike the edit distance cost model, is not robust to the decomposition of complex variants. For example, a single complex variant counts the same as an equivalent entry set of three SNVs (Figure 1(b)). We believe that matching using both models can make any resulting conclusions more robust to diversity in variant representation and/or highlight important differences.

Given a reference genome  $R$ , two variant sequences  $V$  and  $W$ , a type of equivalence (either genotype or variant), and a scoring function  $F$ , the variant matching problem  $\text{VARMATCH}(R, V, W)$  is to find two corresponding selection sequences  $(\Phi_V, \Phi_W)$  such that  $(V, \Phi_V)$  and  $(W, \Phi_W)$  are equivalent and have the highest score amongst all equivalent pairs.

### 3 METHODS

In this section, we develop an algorithm for the  $\text{VARMATCH}$  problem. First, we prove Theorem 1, which allows a divide-and-conquer strategy to be applied (Section 3.1). Then, we describe our algorithm to partition a problem into smaller sub-problems using the LinearClustering algorithm (Section 3.2). Finally, we solve each subproblem using an exact branch and bound algorithm (Section 3.3), based on Cleary *et al.* (2015). This is done over multiple threads, with each thread solving its own subproblem. The computational complexity of  $\text{VARMATCH}$  remains open.

#### 3.1 Partitioning theorem

In this section, we derive our main theorem which forms the basis of the VarMatch algorithm. First, we prove the following two lemmas about strings.

LEMMA 1. *Given non-empty strings  $a, b$ , and  $c$ , if  $ab = bc$ , then  $d = abc$  is a tandem repeat with repeat unit  $a$ .*

PROOF. In the case that  $|b| = |a|$ , then  $a = b = c$  and  $d = a^3$  is a tandem repeat with  $a$  as a repeat unit.

Now consider the case that  $|b| < |a|$ . Then,  $b$  is a prefix of  $a$ , and we can write  $a = bb_0$ , for some non-empty string  $b_0$ . Then,  $bc = ab = bb_0b$ , and  $c = b_0b$ . Then  $d = abc = bb_0bb_0b$  is a tandem repeat with repeat unit  $bb_0 = a$ .

Now consider the case that  $|b| > |a|$ . We prove this case by induction on the length of  $d$ . The base case of  $|d| = 3$  is trivial. In the general case, since  $ab = bc$ , then  $|a| = |c|$ . Moreover,  $b$ 's prefix of length  $|b| - |c|$  is equal to its suffix of length  $|b| - |a|$ . Denote this string as  $b_1$ . We can then write  $b = ab_1$  and  $b = b_1c$ . We now apply the Lemma inductively to the equality of  $ab_1 = b_1c$  and get that  $ab_1c$  is a tandem repeat with repeat unit  $a$ . Then,  $d = abc = aab_1c$  is also a tandem repeat with repeat unit  $a$ .  $\square$

LEMMA 2. *Given strings  $s_1 = x_1yz_1$  and  $s_2 = x_2yz_2$ , if  $x_1 \neq x_2$  or  $z_1 \neq z_2$ ,  $y$  is not a tandem repeat and  $|y| > 2 \cdot \min(\text{abs}(|x_1| - |x_2|), \text{abs}(|z_1| - |z_2|))$ , then  $s_1 \neq s_2$ .*

PROOF. First, observe that if either  $|x_1| = |x_2|$  or  $|z_1| = |z_2|$ , then it is trivial to show that  $s_1 \neq s_2$ . Therefore, we can assume that  $|x_1| \neq |x_2|$  and  $|z_1| \neq |z_2|$ . Also assume, without loss of generality, that  $|x_1| > |x_2|$ .

Assume for the sake of contradiction that  $s_1 = s_2$ . Then, since  $|s_1| = |s_2|$ , we have that  $|x_1| - |x_2| = |z_2| - |z_1|$ . Therefore,  $|y| > 2 \cdot \max(\text{abs}(|x_1| - |x_2|), \text{abs}(|z_1| - |z_2|)) = 2(|x_1| - |x_2|)$ . We can then divide  $y$  into three non-empty parts  $y = y_1y_2y_3$ , such that  $|y_1| = |y_3| = |x_1| - |x_2|$ . Because  $s_1 = s_2$ , we have that  $x_1y_1y_2y_3z_1 = x_2y_1y_2y_3z_2$ . Using what we know about the lengths of these strings, we have that  $y_1y_2 = s_1[|x_1|, |s_1| - |z_1| - |y_3| - 1] = s_1[|x_1|, |s_1| - |z_2| - 1] = s_2[|x_1|, |s_2| - |z_2| - 1] = s_2[|x_2| + |y_1|, |s_2| - |z_2| - 1] = y_2y_3$ . Applying Lemma 1 to the equality  $y_1y_2 = y_2y_3$ , we get that  $y = y_1y_2y_3$  must be a tandem repeat, contradicting the conditions on  $y$ .  $\square$

Let  $X$  and  $Y$  be two variant sequences. We define the *max change in length* of  $X$  and  $Y$ , denoted by  $\text{MCL}(X, Y)$ , as

$$\max_{\Phi_X, \Phi_Y, d_X, d_Y \in \{0,1\}} \text{abs}(|\Delta(R, X, \Phi_X, d_X)| - |\Delta(R, Y, \Phi_Y, d_Y)|)$$

Intuitively,  $\text{MCL}(X, Y)$  is the maximum difference in the size of the donor sequences that can be obtained for any selection sequences over  $X$  and  $Y$ .

**THEOREM 1.** Consider an interval of the reference,  $[b, e]$ , for  $0 \leq b \leq e < |R|$ . Consider four variant sequences,  $V_{i,j}$ , for  $i \in \{0, 1\}$  and  $j \in \{0, 1\}$ , satisfying

1.  $V_{0,0}$  and  $V_{1,0}$  only affect  $R_0 = R[0, b - 1]$ ,
2.  $V_{0,1}$  and  $V_{1,1}$  only affect  $R_1 = R[e + 1, |R| - 1]$ .
3.  $R[b, e]$  is not a tandem repeat
4.  $|R[b, e]| > 2 \cdot \min_j(\text{MCL}(V_{0,j}, V_{1,j}))$

For all  $j$ , let  $(\Phi_{0,j}, \Phi_{1,j})$  be an optimal solution for  $\text{VARMATCH}(R_j, V_{0,j}, V_{1,j})$ . Let  $V_i = V_{i,0} \cdot V_{i,1}$  and  $\Phi_i = \Phi_{i,0} \cdot \Phi_{i,1}$ , for all  $i$ . Then,  $(\Phi_0, \Phi_1)$  is an optimal solution for  $\text{VARMATCH}(R, V_0, V_1)$ .

PROOF. Let  $(\Phi_0^*, \Phi_1^*)$  be an optimal solution for  $\text{VARMATCH}(R, V_0, V_1)$ , and suppose for the sake of contradiction that it is better than  $(\Phi_0, \Phi_1)$ .

Let  $\Phi_{i,0}^* = \Phi_i^*[0, |V_{i,0}| - 1]$  and  $\Phi_{i,1}^* = \Phi_i^*[|V_{i,0}|, |\Phi_i^*| - 1]$ . For the score functions we consider in this paper,  $\sum_{j \in \{0,1\}} F(V_{0,j}, V_{1,j}, \Phi_{0,j}^*, \Phi_{1,j}^*) = F(V_0, V_1, \Phi_0^*, \Phi_1^*) > F(V_0, V_1, \Phi_0, \Phi_1) = \sum_{j \in \{0,1\}} F(V_{0,j}, V_{1,j}, \Phi_{0,j}, \Phi_{1,j})$ . Then, there must exist a  $j$  such that  $F(V_{0,j}, V_{1,j}, \Phi_{0,j}^*, \Phi_{1,j}^*) > F(V_{0,j}, V_{1,j}, \Phi_{0,j}, \Phi_{1,j})$ . We can assume without loss of generality that  $j = 0$ .

Intuitively, this means that the optimal solution to  $\text{VARMATCH}(R, V_0, V_1)$ , projected onto the “left” variants (i.e.  $V_{0,0}$  and  $V_{1,0}$ ), has a higher score than the optimal solutions of the “left” problem alone, i.e.  $\text{VARMATCH}(R_0, V_{0,0}, V_{1,0})$ . This can only be possible because this projection is not a feasible solution to the “left” problem, i.e. the donor sequences are not identical. Thus, there exist  $d \in \{0, 1\}$  such that  $\Delta(R_0, V_{0,0}, \Phi_{0,0}^*, d) \neq \Delta(R_0, V_{1,0}, \Phi_{1,0}^*, d)$ .

Let  $t_{i,j} = \Delta(R_j, V_{i,j}, \Phi_{i,j}^*, d)$  and  $t_i = \Delta(R, V_i, \Phi_i^*, d)$ , for all  $i$  and  $j$ . We will apply Lemma 2 to the strings  $t_1$  and  $t_2$ . To see that the conditions of Lemma 2 apply, observe that

- $\forall i, t_i = t_{i,0} \cdot R[b, e] \cdot t_{i,1}$
- $t_{0,0} \neq t_{1,0}$
- $R[b, e]$  is not a tandem repeat.
- $|R[b, e]| > 2 \cdot \min_j(\text{MCL}(V_{0,j}, V_{1,j})) \geq 2 \cdot \min_j \text{abs}(|t_{0,j}| - |t_{1,j}|)$

Then, Lemma 2 implies that  $t_0 \neq t_1$ . However, this contradicts that  $(\Phi_0^*, \Phi_1^*)$  is a solution for  $\text{VARMATCH}(R, V_0, V_1)$ .  $\square$

### 3.2 Clustering algorithm

Theorem 1 can be applied to the  $\text{VARMATCH}$  problem to divide the input into subproblems that can be solved separately. In particular, we can identify *separator* regions — long-enough regions of the reference that are not affected by any variants and are not tandem repeats. We can then divide our variants into two clusters — those on the left and on the right of the separator region. Each cluster can be solved independently, and the solutions can then be trivially combined.

Many clustering strategies are possible, based on how these separator regions are identified. Some strategies may be better than others at reducing the problem size by creating more clusters. However, we found a simple greedy strategy works well in practice. We make a linear scan through all the variants, and for each new variant, we check if the reference region between it and the previous variant is a separator. If it is, then we start a new cluster and add the current variant to it. If not, we simply add the current variant to the current cluster. The pseudocode for the algorithm, called *LinearClustering*, is provided below.

In order to check if a region is long-enough to be a separator, we check if its length is  $> 2\gamma$ , where  $\gamma = \text{MCL}(V'_0, V'_1)$  and  $V'_0$  and  $V'_1$  are the variants in the current cluster. This ignores the  $\text{MCL}$  of the variants to the right of the separator, which are not yet known due to the greedy nature of our algorithm. In terms of Theorem 1, instead of finding  $\min_j \text{MCL}(V_{0,j}, V_{1,j})$ , our algorithm just calculates  $\text{MCL}(V_{0,0}, V_{1,0})$ . Theorem 1 still applies, since  $|R[b, e]| > 2 \cdot \text{MCL}(V_{0,0}, V_{1,0}) \geq \min_j \text{MCL}(V_{0,j}, V_{1,j})$ .

To maintain the current value of  $\gamma$ , our algorithm maintains four counters. The running total of the maximum possible decrease (respectively, increase) of the reference length for the variants  $V'_0$  and  $V'_1$  is maintained by  $\alpha_0$  and  $\alpha_1$  (respectively,  $\beta_0$  and  $\beta_1$ ). Then, we can compute  $\gamma = \max(\beta_0 + \alpha_1, \beta_1 + \alpha_0)$ . To check if a potential separator is tandem repeat, we use a simple algorithm described in *Fungtammasan et al. (2015)*.

### 3.3 Exact branch and bound algorithm

In this subsection, we present an exact branch and bound algorithm for the  $\text{VARMATCH}$  problem. It takes as input two variant sequences  $V, W$  and reference genome  $R$ . For  $0 \leq i \leq |V|, 0 \leq j \leq |W|$ , a  $(i, j)$ -partial solution is a pair of selection

---

**Algorithm** LinearClustering

---

**Input:** Variant sequences  $V_0, V_1$ , reference sequence  $R$

**Output:** A partitioning of the variants into clusters.

```

1:  $\alpha_0, \alpha_1, \beta_0, \beta_1 \leftarrow 0$   $\triangleright$  accumulated MCL counters
2:  $c \leftarrow 0$   $\triangleright$  cluster id
3:  $b, e \leftarrow 0$   $\triangleright$  positions in  $R$ 
4: for all variants  $v \in V_0 \cup V_1$ , in increasing order of  $v.p$  do
5:   if  $v$  is not the first variant considered then
6:      $e \leftarrow v.p - 1$ 
7:     if  $b < e$  then
8:        $\gamma \leftarrow \max(\beta_0 + \alpha_1, \beta_1 + \alpha_0)$   $\triangleright$  set MCL
9:       if  $e - b + 1 > 2 \cdot \gamma$  and  $R[b, e]$  is not a tandem
         repeat then
10:         $c \leftarrow c + 1$   $\triangleright$  separate cluster
11:         $\beta_0, \beta_1, \alpha_0, \alpha_1 \leftarrow 0$   $\triangleright$  Reset MCL counters
12:      end if
13:    end if
14:  end if
15:   $b \leftarrow \max(b, v.p + |v.r|)$ 
16:  Assign  $v$  to cluster  $c$ 
17:  Let  $j \in \{0, 1\}$  such that  $v \in V_j$ 
18:   $\alpha_j \leftarrow \alpha_j + \max(0, |v.r| - |v.a_0|, |v.r| - |v.a_1|)$ 
19:   $\beta_j \leftarrow \beta_j + \max(0, |v.a_0| - |v.r|, |v.a_1| - |v.r|)$ 
20: end for

```

---

sequences  $\Phi_V$  and  $\Phi_W$ , such that  $\Phi_V$  has all the positions after the  $i^{\text{th}}$  one set to 0 and  $\Phi_W$  has all the positions after the  $j^{\text{th}}$  one set to 0. Our algorithm maintains a queue  $Q$  of partial solutions, initialized with a  $(0, 0)$ -partial solution. The main body of our algorithm is a loop where in each step, we pop a partial solution  $s$  from  $Q$ , pick from  $V$  or  $W$  the closest variant  $v$  that is not in  $s$ , and create and push onto  $Q$  three new partial solutions corresponding to the three selection options for  $v$ . The loop stops when  $Q$  contains only  $(|V|, |W|)$ -partial solutions, and we output the highest scoring one.

We employ two main strategies to prune the search space. First, consider an  $(i, j)$ -partial solution  $(\Phi_V, \Phi_W)$  and the shortest genome sequence  $R'$  that is affected by the first  $i$  variants of  $V$  and the first  $j$  variants of  $W$ . We can apply the partial solution to  $R'$  to get two pairs of donor sequences  $v_0, v_1$  and  $w_0, w_1$ . We call these *partial donors* corresponding to the partial solution. We can safely discard this partial solution if there exists an  $i \in \{0, 1\}$  such that  $v_i$  is not the prefix of  $w_i$ , and  $w_i$  is not the prefix of  $v_i$ . In such cases, no matter how the partial solution is extended, the donor strings will never be identical. For the second pruning strategy, fix  $i$  and  $j$  and consider a set of  $(i, j)$ -partial solutions with the same partial donor sequences lengths. We can discard all partial solutions in such a set except for one with the highest score.

The algorithm's running time and memory usage is  $\Omega(3^{|V|+|W|})$ , since this is the number of possible solutions. However, the pruning strategies make the algorithm fast in practice, since it is applied only on small subproblems generated by the LinearClustering algorithm. Our algorithm is based on and similar to the algorithm of Cleary *et al.* (2015).

The novelty here is to properly formalize it into a branch and bound framework, to branch the search tree on variants instead of on nucleotides, and to optimize the pruning operations.

## 4 RESULTS

We implemented the VarMatch Toolkit, which takes multiple query VCF files and matches them separately to one baseline VCF file. Based on the various scoring functions and equivalence definitions given in Section 2, our software runs in different modes. The cost model can be either unit (denoted by U) or edit distance (E), the equivalence mode can be either genotype (G) or variant (V), and the scoring scheme can be either baseline (B), query (Q), or the total (T). Considering all combinations there are 12 possible modes, each denoted by a three letter abbreviation (e.g. UGT for unit cost, genotype equivalence, and total scoring scheme).

For each query pair, VarMatch automatically matches it to the baseline simultaneously using all the modes and outputs files containing annotations of matched variants and recall and precision statistics and plots. Since different matching criteria is performed inside each small cluster, the total running time and memory usage do not significantly increase. It also identifies and outputs visualizations of variants that are matched in one mode but not in another (as in Figure 4). VarMatch can also create Precision-Recall curves by varying the minimum quality cutoff for the VCF file.

### 4.1 Datasets

To evaluate the performance of VarMatch, we selected five state-of-the-art variant calling methods: Platypus(pt), Freebayes(fb), GATK HaplotypeCaller(hc), GATK Unified-Genotyper(ug) and SAMtools(st). The algorithms of these tools vary; resulting in potentially different representations of variants. For example, pt performs local assembly, pt/hc/ug perform local realignment, and pt/fb try to phase haplotypes and thus tend to merge nearby variants into longer complex variants.

For evaluation, we use the variant call sets provided by Li (2014). The CHM1 dataset comes from 65x Illumina sequencing of the haploid CHM1hTERT cell line, mapped to GRCh37 using bowtie2, and small variants called separately by fb/hc. The CHM1 dataset has less variants, due to the haploid nature of the CHM1hTERT cell line. The NA12878 dataset comes from 55x Illumina sequencing of the NA12878 diploid cell line, mapped to GRCh37 using bowtie2, and small variants called separately by fb/ug/pt/st. It also includes Freebayes run on mappings generated by BWA-MEM, which we will refer to as bwa-fb. Samtools was not run in genotype mode, and only the presence of alternate alleles, and not the corresponding genotype, was reported.

### 4.2 Evaluating VarMatch's accuracy and resources

We compared VarMatch against the normalization algorithm (running vt (Tan *et al.*, 2015) followed by strict matching)

and RTG Tools (Cleary *et al.*, 2015) (with parameters ‘-all-records’ and ‘-ref-overlap’). All experiments were run on an Intel Xeon CPU with 32 cores at 2.76GHz and 512 GB of RAM. VarMatch and RTG Tools are multi-threaded and were allowed to use all threads, while *vt* is single threaded. VarMatch was run in UGT mode. Table 1 shows the results of comparing CHM1 fb to CHM1 hc datasets. RTG Tools and VarMatch match the same set of variants. Both RTG Tools and VarMatch match more entries than *vt* at the cost of more resources, but VarMatch uses less running time and an order of magnitude less memory than RTG Tools.

| Method    | # Matched Entries |           | RAM (Gb) | Time (s) |
|-----------|-------------------|-----------|----------|----------|
|           | fb                | hc        |          |          |
| <i>vt</i> | 2,778,372         | 2,778,372 | 0.004    | 216      |
| RTG Tools | 2,843,396         | 2,912,641 | 48       | 456      |
| VarMatch  | 2,843,396         | 2,912,641 | 5        | 302      |

**Table 1.** Comparison of VarMatch to CHM1 fb and hc datasets.

Table 2 shows the results of comparing NA12878 fb and ug datasets. In this dataset, RTG Tools reported skipping 23 genome regions because it reached the search space upper bound, discarding all the variants in these regions. As a result, VarMatch matches more entries than RTG Tools. Though the number of variants of these variants is small, they are located in regions dense with variants which are often of particular interests to researchers. Again, both RTG Tools and VarMatch match more VCF entries than *vt* at the cost of more resources, but VarMatch uses less running time and an order of magnitude less memory than RTG Tools.

| Method    | # Matched Entries |           | RAM (Gb) | Time (s) |
|-----------|-------------------|-----------|----------|----------|
|           | fb                | ug        |          |          |
| <i>vt</i> | 4,092,161         | 4,092,161 | 0.004    | 406      |
| RTG Tools | 4,197,070         | 4,321,997 | 73       | 661      |
| VarMatch  | 4,197,138         | 4,322,083 | 7        | 451      |

**Table 2.** Comparison of VarMatch to NA12878 fb and ug.

We also evaluated the effectiveness of our clustering algorithm. Figure 2 shows the distribution of the sizes of each subproblem. VarMatch partitions 6,438,208 initial small variants into 3,272,206 subproblems, 99.9% of which have less than nine variants in them.

To test VarMatch’s ability to match between datasets with and without genotype information, we compared the NA12878 fb and st datasets using UVT mode. We could match 4,185,276 fb calls with 4,090,609 st calls, while RTG Tools could not process the st dataset due to lack of genotype calls.

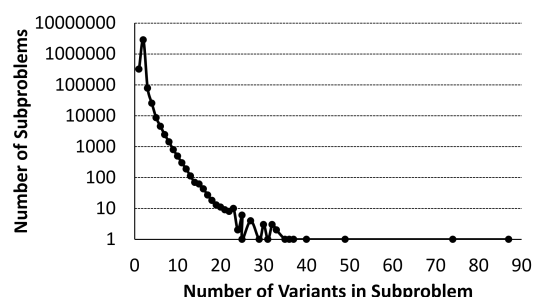

**Fig. 2:** Distribution of number of variants in subproblems for experiment in Table 1.

### 4.3 Comparison of different modes

We evaluate the difference in results when different scoring schemes and equivalence modes are used. Table 3 illustrates the results on the NA12878 fb and ug datasets. Observe that on this dataset, ug outperforms fb in most modes, but there is a discrepancy when variant equivalence is used — the edit distance score favors fb while the number of variants matched favors ug. This could indicate that, in this dataset, fb is better at detecting the presence of variants then it is at genotyping them. Observe also that fb has more matches when the scoring scheme maximizes the number of fb matches (e.g. UGB) then when the total number of matches in both fb and ug are maximized (e.g. UGT). VarMatch flags variants that are matched in one mode but not in the other, making it possible for a researcher to further investigate the source of such discrepancies. These may uncover bugs, quirks, or features of a variant caller. Figure 3 and Figure 4 show examples, simplified from real data, that illustrate why the number of matched variants varies under different criteria. We recommend users to run VarMatch simultaneously in all modes (the default option), and using the graphs, tables, and visualizations provided in the output to detect and understand any anomalies in the datasets.

### 4.4 Matching variants in hard regions

To illustrate the power of VarMatch to detect matches, we focus on genomic regions where variants are particularly hard to match. Zook *et al.* (2014) released a high quality benchmark containing variant calls for NA12878, which provides a natural baseline against which different variant callers can be compared. However, in a recent evaluation study, Highnam *et al.* (2015) excluded any 10bp regions that contain an INDEL and another variant in the benchmark, due to the difficulty of matching variants in those regions. In Table 4, we measured the accuracy of fb and pt in detecting precisely the variants in these dense regions. On the whole benchmark, fb has higher recall than pt, but pt has higher recall in dense regions. The use of VarMatch can allow studies such as Highnam *et al.* (2015) to measure accuracy in these important regions as well.

We also downloaded co-ordinates of low complexity regions (Li, 2014), covering about 2% of the autosomal genome.

| Mode | # Matched Entries |           | Edit Distance Score |           |
|------|-------------------|-----------|---------------------|-----------|
|      | fb                | ug        | fb                  | ug        |
| UGT  | 4,197,138         | 4,322,083 | 5,184,864           | 5,169,151 |
| UGB  | 4,197,146         | 4,322,051 | 5,184,895           | 5,169,139 |
| UGQ  | 4,197,107         | 4,322,089 | 5,184,749           | 5,169,115 |
| UVT  | 4,266,505         | 4,411,621 | 7,042,027           | 7,046,191 |
| UVB  | 4,266,538         | 4,410,696 | 7,041,085           | 7,044,553 |
| UVQ  | 4,266,421         | 4,411,636 | 7,041,861           | 7,046,161 |
| EGT  | 4,197,146         | 4,322,068 | 5,184,899           | 5,169,166 |
| EGB  | 4,197,146         | 4,322,048 | 5,184,907           | 5,169,129 |
| EGQ  | 4,197,132         | 4,322,074 | 5,184,879           | 5,169,169 |
| EVT  | 4,266,497         | 4,410,846 | 7,127,275           | 7,131,471 |
| EVB  | 4,266,501         | 4,410,623 | 7,127,409           | 7,130,557 |
| EVQ  | 4,266,435         | 4,410,881 | 7,126,871           | 7,131,537 |

**Table 3.** Number of matched variants and the edit distance score from the NA12878 fb and ug datasets, under different modes of VarMatch. Baseline is arbitrarily chosen to be fb, and the query to be ug.

| VCF Entry Set | VCF Entries |   |   |   |   |   |   |   |   |   |   |   |   |   |   |   |
|---------------|-------------|---|---|---|---|---|---|---|---|---|---|---|---|---|---|---|
|               | Seq         | A | - | - | A | G | A | - | - | G | A | G | A | A | A | G |
| fb            | REF         |   |   |   |   |   |   |   |   |   |   |   |   |   |   |   |
|               | ALT         |   |   |   |   |   |   |   |   |   |   |   |   |   |   |   |
| ug            | REF         |   |   |   |   |   |   |   |   |   |   |   |   |   |   |   |
|               | ALT         |   |   |   |   |   |   |   |   |   |   |   |   |   |   |   |

**Fig. 3:** An example where different numbers of matches are made in the total scoring scheme then in the baseline scoring scheme. VCF entries are represented by boxes but are grouped together into entry sets from fb as baseline and ug as query. We put dashes into the reference (Seq) to space it out for the purposes of illustrating insertions. Under the total scoring scheme, the fb entry represented by a black box (with GAGA as the reference allele) matches the four ug entries in red boxes (all SNVs). The total number of variants in this match is five but only one is from the baseline. At the same time, all the three fb variants match the two green ug variants (indels). The total number of variants is five but there are three from the baseline.

Alignment and variant calling is particularly challenging in these regions, often leading to different representations, and we evaluated how VarMatch performs there. Figure 5 shows the comparison of NA12878 ug, pt, and bwa-fb datasets, restricted to variants in the low complexity regions and using ug as a baseline. VarMatch is able to detect 14% more matches than the normalization algorithm.

## 5 DISCUSSION

In this paper, we presented VarMatch, an open-source parallel tool for matching equivalent genetic variants. VarMatch is robust to different representations of complex variants and supports flexible scoring schemes. We demonstrated that it can detect more matches than the normalization algorithm

| VCF Entry Set | VCF Entries |   |   |   |   |   |   |   |   |   |   |   |   |  |  |  |
|---------------|-------------|---|---|---|---|---|---|---|---|---|---|---|---|--|--|--|
|               | Seq         | A | T | G | T | G | A | G | A | T | A | T | T |  |  |  |
| fb            | REF         |   |   |   |   |   |   |   |   |   |   |   |   |  |  |  |
|               | ALT         |   |   |   |   |   |   |   |   |   |   |   |   |  |  |  |
| ug            | REF         |   |   |   |   |   |   |   |   |   |   |   |   |  |  |  |
|               | ALT         |   |   |   |   |   |   |   |   |   |   |   |   |  |  |  |

**Fig. 4:** An example where different matches are made in unit vs. edit distance cost model (UGT vs. EGT). The fb entry represented by a black box (on the left) matches the ug entries in red and orange boxes (the right three), giving a match with four total variants and an edit distance of seven. At the same time, all the fb entries match the ug entries represented by green and orange boxes, giving a match with four total variants and an edit distance of eight.

|               | # Matched Benchmark Entries |           |
|---------------|-----------------------------|-----------|
|               | fb                          | pt        |
| genome-wide   | 2,896,841                   | 2,891,849 |
| dense regions | 24,188                      | 24,522    |

**Table 4.** The number of benchmark variants matched by fb and pt (in UGB mode), from the whole genome (first row) and just the dense regions (second row).

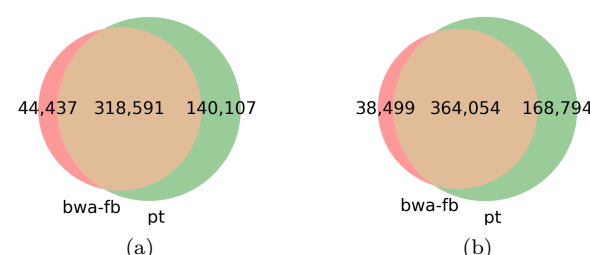

**Fig. 5:** Number of variants matched in low complexity regions, using the normalization algorithm (a) and VarMatch (b). The datasets are the NA12878 bwa-fb (in red, left), pt (green, right), and brown (middle) is their intersection.

and is faster and uses an order-of-magnitude less memory than RTG Tools. It is important to note that, for evaluating a variant caller, VarMatch should be used in conjunction with other validations (e.g. longer haplotypes are not reflected in a higher match score but are a desirable feature).

One weakness of VarMatch is that it is still exponential time in the worst case. There are theoretical cases when the run-time would become infeasible, when there is large number of similar variants within a long tandem repeat region (e.g. 100 SNVs within a 500bp poly-A region). In such a case, our clustering algorithm would fail to divide the input and the branch and bound algorithm would also fail to prune the search space. We did not observe such extreme conditions

in our experiments, however, to handle this contingency, we monitor our search space and when it reaches a fixed upper bound, we apply the strict matching algorithm to the cluster.

Finally, the power of Theorem 1 is not fully explored in our linear clustering algorithm. For instance, it might be possible that while the region bounded by two variants is not a separator, a smaller sub-region is. Additionally, we only calculate  $MCL(V_{0,0}, V_{1,0})$ , but computing  $\min_j MCL(V_{0,j}, V_{1,j})$  may detect new separators. Our current linear clustering algorithm is sufficient for our experiments, but a more powerful clustering algorithm is also theoretically possible.

**Acknowledgements** This work has been supported in part by NSF awards DBI-1356529, CCF-1439057, IIS-1453527, and IIS-1421908 to PM.

## REFERENCES

- 1000 Genomes Project Consortium *et al.* (2010). A map of human genome variation from population-scale sequencing. *Nature*, **467**(7319), 1061–1073.
- 1000 Genomes Project Consortium *et al.* (2012). An integrated map of genetic variation from 1,092 human genomes. *Nature*, **491**(7422), 56–65.
- Assmus, J., Kleffe, J., Schmitt, A. O., and Brockmann, G. A. (2013). Equivalent indels—ambiguous functional classes and redundancy in databases. *PLoS one*, **8**(5), e62803.
- Baes, C. F., Dolezal, M. A., Koltjes, J. E., Bapst, B., Fritz-Waters, E., Jansen, S., Flury, C., Signer-Hasler, H., Stricker, C., Fernando, R., *et al.* (2014). Evaluation of variant identification methods for whole genome sequencing data in dairy cattle. *BMC genomics*, **15**(1), 1.
- Cheng, A. Y., Teo, Y.-Y., and Ong, R. T.-H. (2014). Assessing single nucleotide variant detection and genotype calling on whole-genome sequenced individuals. *Bioinformatics*, **30**(12), 1707–1713.
- Cleary, J. G., Braithwaite, R., Gaastra, K., Hilbush, B. S., Inglis, S., Irvine, S. A., Jackson, A., Littin, R., Rathod, M., Ware, D., *et al.* (2015). Comparing variant call files for performance benchmarking of next-generation sequencing variant calling pipelines. *bioRxiv*, page 023754.
- Cornish, A. and Guda, C. (2015). A comparison of variant calling pipelines using genome in a bottle as a reference. *BioMed research international*, **2015**.
- Danecek, P., Auton, A., Abecasis, G., Albers, C. A., Banks, E., DePristo, M. A., Handsaker, R. E., Lunter, G., Marth, G. T., Sherry, S. T., *et al.* (2011). The variant call format and VCFtools. *Bioinformatics*, **27**(15), 2156–2158.
- Fungtammasan, A., Ananda, G., Hile, S. E., Su, M. S.-W., Sun, C., Harris, R., Medvedev, P., Eckert, K., and Makova, K. D. (2015). Accurate typing of short tandem repeats from genome-wide sequencing data and its applications. *Genome research*, **25**(5), 736–749.
- Garrison, E. and Marth, G. (2012). Haplotype-based variant detection from short-read sequencing. *arXiv preprint arXiv:1207.3907*.
- Highnam, G., Wang, J. J., Kusler, D., Zook, J., Vijayan, V., Leibovich, N., and Mittelman, D. (2015). An analytical framework for optimizing variant discovery from personal genomes. *Nature communications*, **6**.
- Hwang, S., Kim, E., Lee, I., and Marcotte, E. M. (2015). Systematic comparison of variant calling pipelines using gold standard personal exome variants. *Scientific reports*, **5**.
- Koboldt, D. C., Chen, K., Wylie, T., Larson, D. E., McLellan, M. D., Mardis, E. R., Weinstock, G. M., Wilson, R. K., and Ding, L. (2009). VarScan: variant detection in massively parallel sequencing of individual and pooled samples. *Bioinformatics*, **25**(17), 2283–2285.
- Krawitz, P., Rödelsperger, C., Jäger, M., Jostins, L., Bauer, S., and Robinson, P. N. (2010). Microindel detection in short-read sequence data. *Bioinformatics*, **26**(6), 722–729.
- Li, H. (2014). Towards better understanding of artifacts in variant calling from high-coverage samples. *Bioinformatics*, **30**(20), 2841–2851.
- Li, H., Handsaker, B., Wysoker, A., Fennell, T., Ruan, J., Homer, N., Marth, G., Abecasis, G., Durbin, R., *et al.* (2009). The sequence alignment/map format and SAMtools. *Bioinformatics*, **25**(16), 2078–2079.
- Mäkinen, V. and Rahkola, J. (2013). Haploid to diploid alignment for variation calling assessment. *BMC bioinformatics*, **14**(Suppl 15), S13.
- Mäkinen, V. and Valenzuela, D. (2014). Recombination-aware alignment of diploid individuals. *BMC genomics*, **15**(Suppl 6), S15.
- McKenna, A., Hanna, M., Banks, E., Sivachenko, A., Cibulskis, K., Kernysky, A., Garimella, K., Altshuler, D., Gabriel, S., Daly, M., *et al.* (2010). The Genome Analysis Toolkit: a MapReduce framework for analyzing next-generation dna sequencing data. *Genome research*, **20**(9), 1297–1303.
- Raczy, C., Petrovski, R., Saunders, C. T., Chorny, I., Kruglyak, S., Margulies, E. H., Chuang, H.-Y., Källberg, M., Kumar, S. A., Liao, A., *et al.* (2013). Isaac: ultra-fast whole-genome secondary analysis on illumina sequencing platforms. *Bioinformatics*, page btt314.
- Rimmer, A., Phan, H., Mathieson, I., Iqbal, Z., Twigg, S. R., Wilkie, A. O., McVean, G., Lunter, G., Consortium, W., *et al.* (2014). Integrating mapping-, assembly-and haplotype-based approaches for calling variants in clinical sequencing applications. *Nature genetics*, **46**(8), 912–918.
- Talwalkar, A., Liptrap, J., Newcomb, J., Hartl, C., Terhorst, J., Curtis, K., Bresler, M., Song, Y. S., Jordan, M. I., and Patterson, D. (2014). Smash: a benchmarking toolkit for human genome variant calling. *Bioinformatics*, **30**(19), 2787–2795.
- Tan, A., Abecasis, G. R., and Kang, H. M. (2015). Unified representation of genetic variants. *Bioinformatics*, page btv112.
- Wei, Z., Wang, W., Hu, P., Lyon, G. J., and Hakonarson, H. (2011). SNVer: a statistical tool for variant calling in analysis of pooled or individual next-generation sequencing data. *Nucleic acids research*, **39**(19), e132–e132.
- Wittler, R., Marschall, T., Schönhuth, A., and Mäkinen, V. (2015). Repeat-and error-aware comparison of deletions. *Bioinformatics*, **31**(18), 2947–2954.
- Zook, J. M., Chapman, B., Wang, J., Mittelman, D., Hofmann, O., Hide, W., and Salit, M. (2014). Integrating human sequence data sets provides a resource of benchmark SNP and indel genotype calls. *Nature biotechnology*, **32**, 246–251.
